# Supplementary material for: αO-Conotoxin GeXIVA Inhibits the Growth of Breast Cancer Cells via Interaction with α9 Nicotine Acetylcholine Receptors
Source: MDPI journal article supplement (doi:10.3390/md18040195), 2020-04-07
Supplement: s1 [file s1]

# Supplementary Materials:

## $\alpha$ O-Conotoxin GeXIVA Inhibits the Growth of Breast Cancer Cells via Interaction with $\alpha$ 9 Nicotine Acetylcholine Receptors

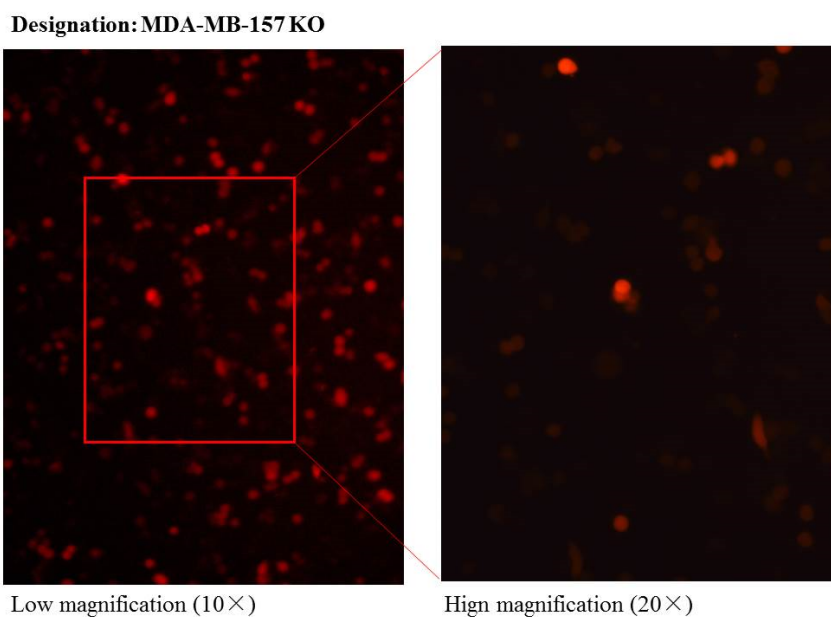

**Figure S1.** The  $\alpha$ 9-nAChR CRISPR/Cas9 KO plasmid and HDR plasmid co-transfected into MDA-MB-157 cell line confirmed by detection of the red fluorescent protein (RFP) via fluorescent microscopy.

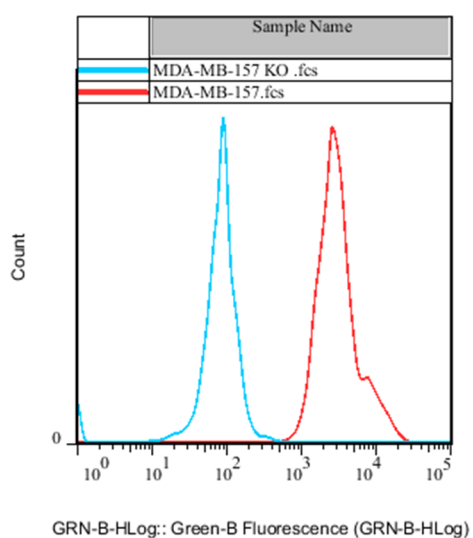

**Figure S2.** Representative histograms of cell distribution according to intensity of FITC-labeled antibody against the  $\alpha$ 9-nAChR for untreated cells (left) and cells with the knocked out  $\alpha$ 9-nAChR expression by CRISPR/Cas9 (right).
